# Supplementary material
Source: publisher figshare collection journal article supplement (https://karger.figshare.com/articles/dataset/_/25341487)

Supplementary Fig. 1. Diagram demonstrating the frequencies and types of *SYNE1* mutation in 451 clear-cell renal cell carcinoma (ccRCC) samples based on the analysis of *SYNE1* mutations using the Cancer Genome Atlas database. Green, yellow, and grey bars indicate missense, splicing, and truncating mutations, respectively.

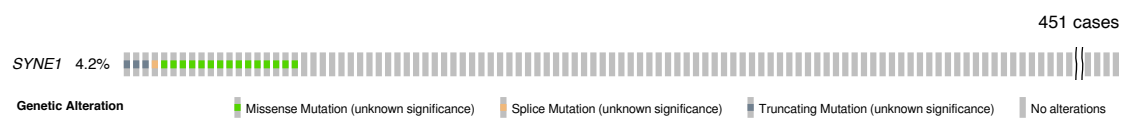

Supplement: Supplementary file 2 [file 1]
